# Supplementary material
Source: PubMed Central journal article supplement (PMC6435388)
Supplement: NIHMS1520812-supplement-1.pdf [file NIHMS1520812-supplement-1.pdf]

**Table S1. Intrinsic properties of CA1-RP neurons.**

|             | <b>R<sub>in</sub></b><br><b>(MΩ)</b> | <b>V<sub>r</sub></b><br><b>(mV)</b> | <b>AP</b><br><b>threshold</b><br><b>(mV)</b> | <b>AP</b><br><b>height</b><br><b>(mV)</b> | <b>AP</b><br><b>width</b><br><b>(ms)</b> | <b>Rheobase</b><br><b>(pA)</b> | <b>Sag</b><br><b>(%)</b> | <b>f/I slope</b><br><b>(Hz/nA)</b> | <b>Max.</b><br><b>spike</b><br><b>frequency</b><br><b>(Hz)</b> |
|-------------|--------------------------------------|-------------------------------------|----------------------------------------------|-------------------------------------------|------------------------------------------|--------------------------------|--------------------------|------------------------------------|----------------------------------------------------------------|
| <b>N</b>    | 24                                   | 24                                  | 24                                           | 24                                        | 24                                       | 10                             | 14                       | 24                                 | 14                                                             |
| <b>Mean</b> | 246.4                                | -63.6                               | 36.7                                         | 57.5                                      | 0.75                                     | 74.0                           | 16.6                     | 204.2                              | 54.7                                                           |
| <b>S.D.</b> | 78.1                                 | 5.2                                 | 5.2                                          | 7.6                                       | 0.20                                     | 26.7                           | 6.6                      | 59.8                               | 18.9                                                           |

R<sub>in</sub>, input resistance; V<sub>r</sub>, resting membrane potential; AP, action potential; f/I, frequency/current.
